# Supplementary material for: How Has COVID-19 Changed the Way We Do Virtual Care? A Scoping Review Protocol
Source: Healthcare (Basel). 2022 Sep 23;10(10):1847. doi: 10.3390/healthcare10101847 (PMC9601957; doi:10.3390/healthcare10101847)
Supplement: Supplementary file 1 [file healthcare-10-01847-s001.zip › healthcare-1852700-supplementary.pdf]

# Data Extraction Tool

[illegible]
